# Supplementary material for: Unexpected formation of novel organometallic hetero-cation crystals with a rare coordination mode
Source: Royal Society of Chemistry journal article supplement (doi:10.1039/b808031c), 2008-01-01
Supplement: b808031c.pdf [file b808031c.pdf]

## Supplementary data

### Unexpected formation of novel organometallic hetero-cation crystals with a rare coordination mode

Fan-Guo Deng,<sup>a,b</sup> Bin Hu,<sup>a</sup> Wei Sun\*<sup>a</sup> and Chun-Gu Xia\*<sup>a</sup>

<sup>a</sup> State key laboratory for Oxo Synthesis and Selective Oxidation, Lanzhou Institute of Chemical Physics, Chinese Academy of Sciences, Lanzhou, 730000, China. Fax: +86-931-8277088; Tel: +86-931-4968278 (Wei Sun); E-mail: [wsun@lzb.ac.cn](mailto:wsun@lzb.ac.cn) (Wei Sun); [cxia@lzb.ac.cn](mailto:cgxia@lzb.ac.cn) (Chun-Gu Xia).

<sup>b</sup> Graduate School of Chinese Academy of Sciences, Beijing, 100039, China.

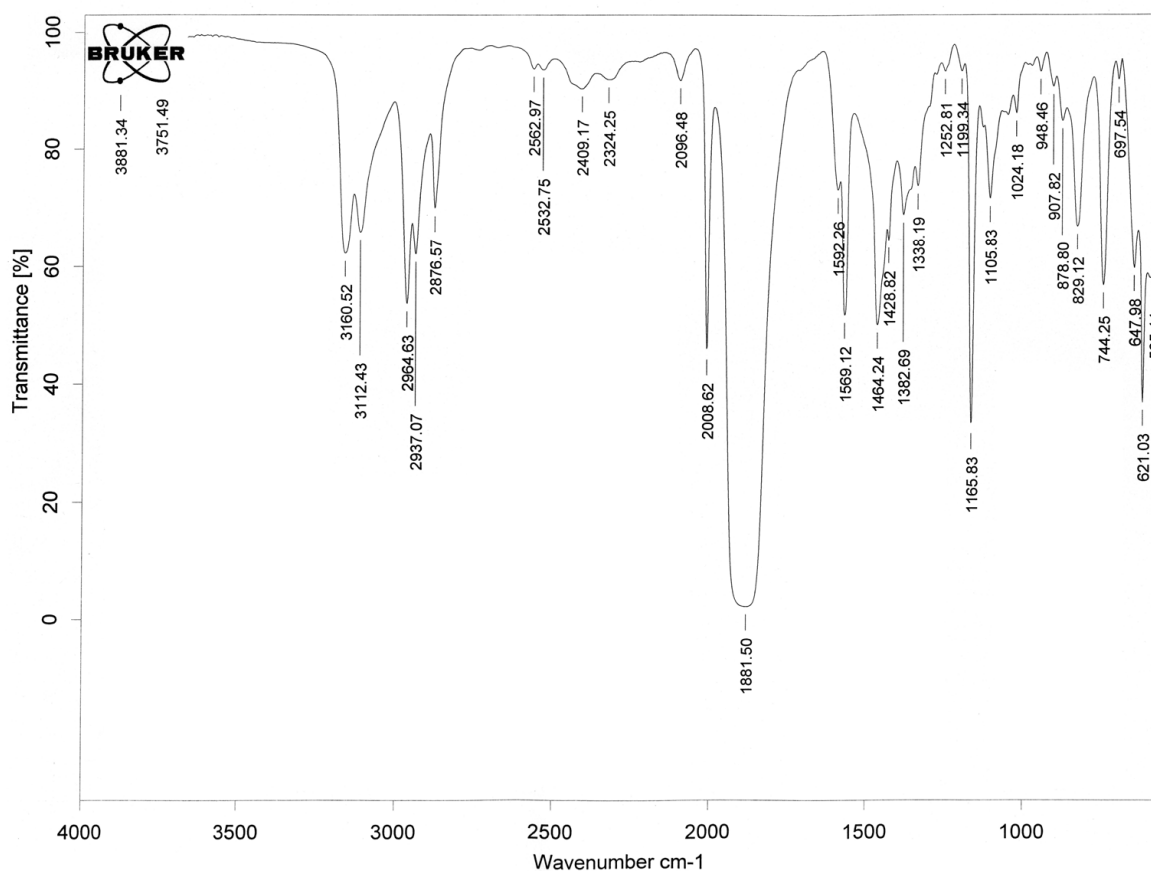

**Figure 1.** IR spectrum of [bmim]K[Co(CO)<sub>4</sub>]<sub>2</sub> with [bmim][Co(CO)<sub>4</sub>] residue (KBr)

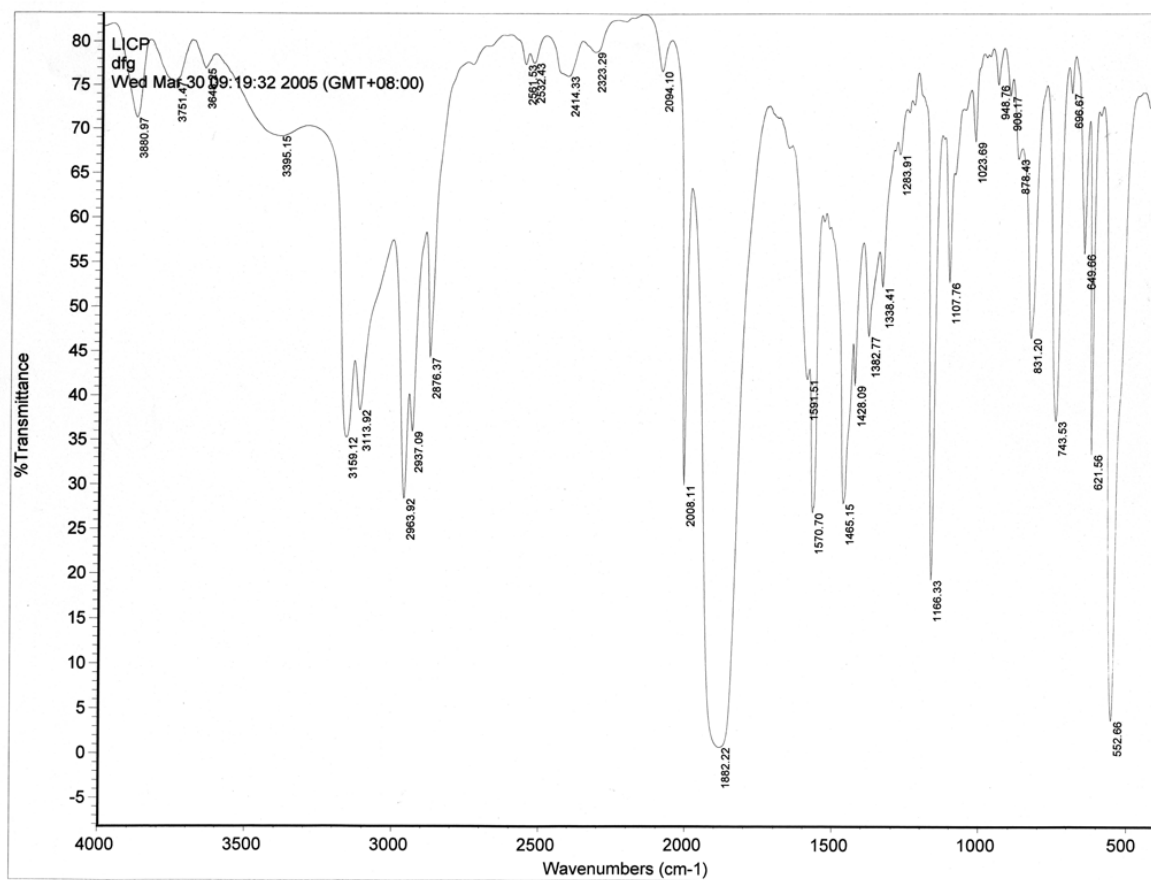

**Figure 2.** IR spectrum of neat [bmim][Co(CO)<sub>4</sub>] (KBr)

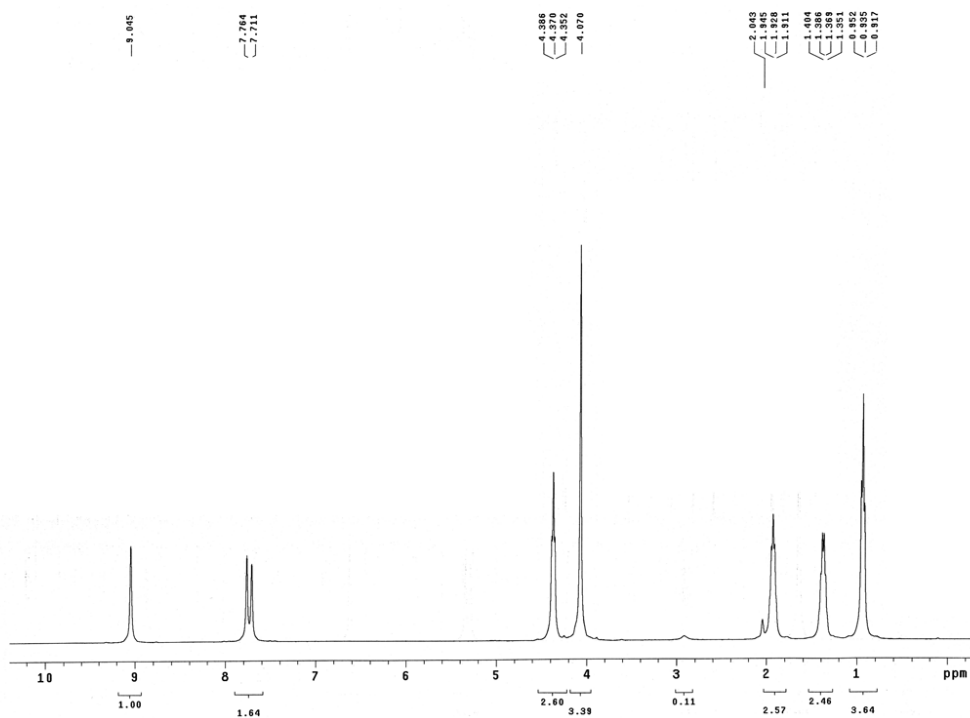

**Figure 3.**  $^1\text{H}$  NMR spectrum of  $[\text{bmim}]\text{K}[\text{Co}(\text{CO})_4]_2$  with  $[\text{bmim}][\text{Co}(\text{CO})_4]$  residue (in acetone- $\text{d}_6$ ), the 2.040ppm peak is attributed to the acetone hydrogens.

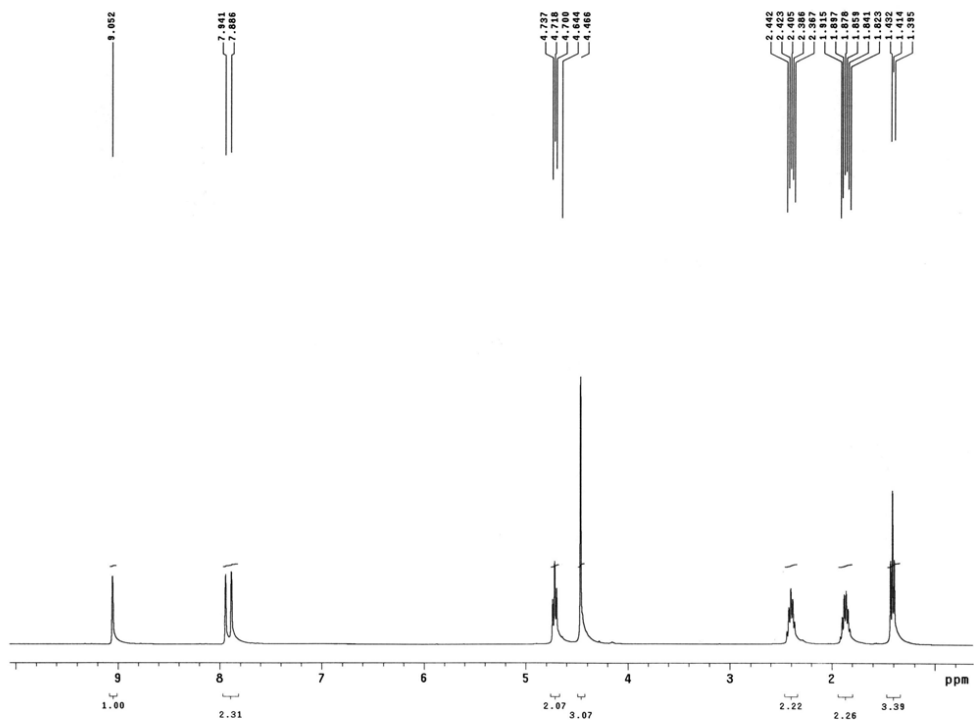

**Figure 4.**  $^1\text{H}$  NMR spectrum of neat  $[\text{bmim}][\text{Co}(\text{CO})_4]$  (for comparison)

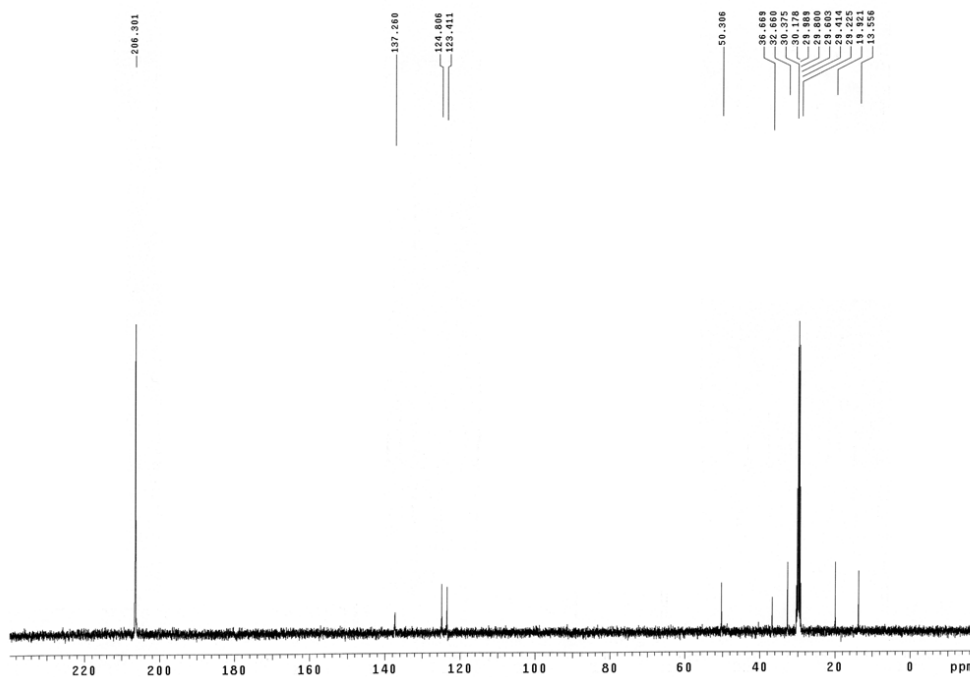

**Figure 5.** <sup>13</sup>C NMR spectrum of [bmim]K[Co(CO)<sub>4</sub>]<sub>2</sub> with [bmim][Co(CO)<sub>4</sub>] residue (in acetone-d<sub>6</sub>), the 206.3 and 29.8ppm peaks are attributed to the acetone carbons.

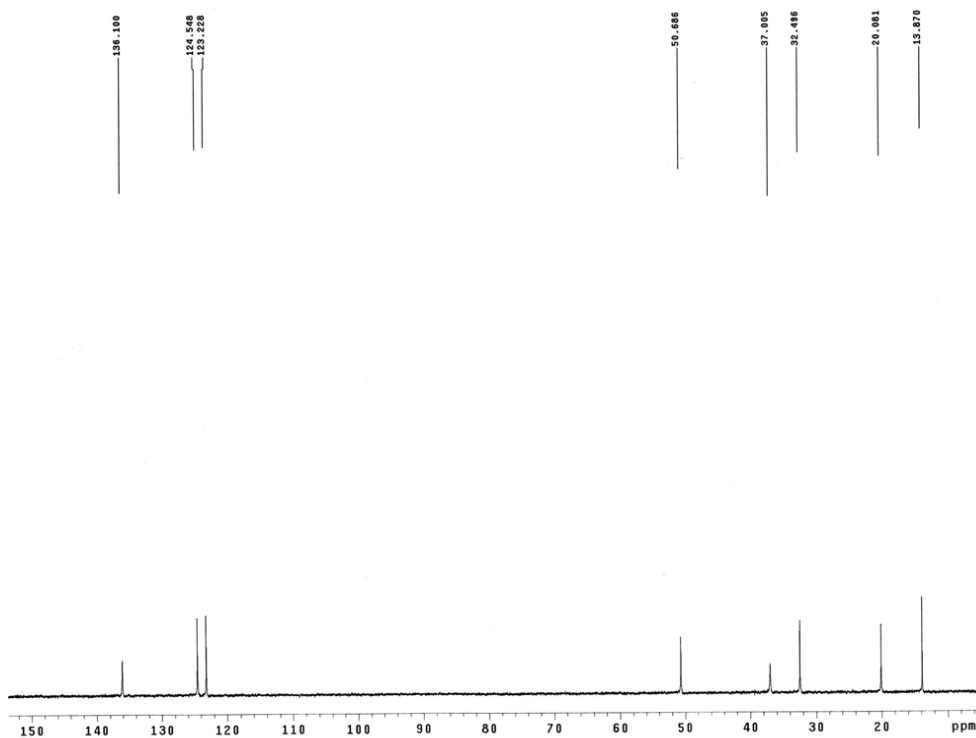

**Figure 6.** <sup>13</sup>C NMR spectrum of neat [bmim][Co(CO)<sub>4</sub>] (for comparison)
